# Supplementary material
Source: PubMed Central journal article supplement (PMC6638083)
Supplement: MPP-19-812-s001.pdf [file MPP-19-812-s001.pdf]

**Table S1. Y2H screening results****A. Fsr1 N-terminal as bait**

| <b>Fv Locus</b>     | <b>Gene name (domain)</b>                                       |
|---------------------|-----------------------------------------------------------------|
| FVEG_00233.3        | Hypothetical protein                                            |
| <b>FVEG_00403.3</b> | <b>putative cyclophilin peptidyl-prolyl cis-trans isomerase</b> |
| FVEG_00510.3        | Hypothetical protein                                            |
| FVEG_00562.3        | 40S ribosomal protein S6-B                                      |
| FVEG_01143.3        | putative alpha keto acid dehydrogenase                          |
| FVEG_01304.3        | cystathionine gamma-lyase                                       |
| FVEG_01449.3        | conserved hypothetical protein (TF)                             |
| <b>FVEG_01920.3</b> | <b>conserved hypothetical protein (Hex1)</b>                    |
| FVEG_02319.3        | putative mitochondrial carrier protein                          |
| FVEG_02948.3        | C-1-tetrahydrofolate synthase                                   |
| FVEG_03125.3        | putative glyoxalase                                             |
| <b>FVEG_04097.3</b> | <b>SCP like extracellular protein</b>                           |
| FVEG_05696.3        | conserved hypothetical protein                                  |
| FVEG_06063.3        | conserved hypothetical protein                                  |
| FVEG_07050.3        | Heat shock protein HSP98                                        |
| FVEG_07289.3        | Eukaryotic translation initiation factor 5A-2                   |
| FVEG_07318.3        | putative cystathionine beta-lyase                               |
| FVEG_07509.3        | conserved hypothetical protein                                  |
| FVEG_08088.3        | putative transcription initiation factor                        |
| FVEG_08459.3        | putative phospholipase B homolog                                |
| FVEG_08486.3        | conserved hypothetical protein                                  |
| FVEG_08639.3        | conserved hypothetical protein                                  |
| FVEG_08746.3        | putative phospholipase B homolog                                |
| FVEG_08950.3        | hypothetical protein                                            |
| FVEG_09495.3        | O-acetylhomoserine                                              |
| FVEG_09511.3        | putative glutamate synthase                                     |
| FVEG_09578.3        | putative choline sulfatase                                      |
| FVEG_10001.3        | conserved hypothetical protein                                  |
| FVEG_10119.3        | putative Antigen1 precursor (no domains)                        |
| FVEG_10127.3        | conserved hypothetical protein                                  |
| FVEG_10358.3        | putative pyruvate dehydrogenase complex                         |
| FVEG_10441.3        | putative short-chain dehydrogenase                              |
| FVEG_10833.3        | hypothetical protein                                            |
| FVEG_11066.3        | putative glutamyl-tRNA synthetase                               |
| <b>FVEG_11334.3</b> | <b>peroxisomal membrane anchor protein</b>                      |
| FVEG_11642.3        | putative 2-oxoglutarate dehydrogenase                           |
| <b>FVEG_12134.3</b> | <b>Conserved hypothetical Sel1 repeat protein</b>               |
| FVEG_12379.3        | conserved hypothetical protein                                  |
| FVEG_12398.3        | putative mannose-binding lectin                                 |
| FVEG_12529.3        | O-acetylhomoserine                                              |
| FVEG_12531.3        | putative FMN-dependent dehydrogease                             |
| FVEG_12848.3        | conserved hypothetical protein                                  |
| FVEG_12878.3        | putative carboxypeptidase Y                                     |
| FVEG_13501.3        | conserved hypothetical protein                                  |
| FVEG_13647.3        | conserved hypothetical protein                                  |
| No Fus homolog      | hypothetical protein                                            |



**Table S2. Additional Description of putative Fsr1-interacting proteins**

| <b>Fv Locus</b> | <b>Gene Name</b> | <b>Key pfam motif</b>                                            | <b>Proposed function</b>                                                                                                                                                                                                                                                                               |
|-----------------|------------------|------------------------------------------------------------------|--------------------------------------------------------------------------------------------------------------------------------------------------------------------------------------------------------------------------------------------------------------------------------------------------------|
| FVEG_00403      | <i>FvCYP1</i>    | cyclophilin-like domain (CLD) (PF04126)                          | Act as a virulence determinant during plant infection in <i>Magnaporthe grisea</i> and <i>Botrytis cinerea</i> (Viaud <i>et al.</i> , 2003); act as modulators of protein function in eukaryotes such as budding yeast cyclophilin Cpr1 (Arevalo-Rodriguez & Heitman, 2005)                            |
| FVEG_04097      | <i>FvSCP1</i>    | sperm-coating protein (SCP)-like extracellular protein (PF00188) | Act as a Ca <sup>2+</sup> -chelator in various signaling processes (Cantacessi <i>et al.</i> , 2009)                                                                                                                                                                                                   |
| FVEG_12134      | <i>FvSEL1</i>    | Sel1-like repeat (SLR) (PF08238 )                                | Involved in signal transduction pathways, involved in the ER-associated protein degradation under cellular stress (Kamauchi <i>et al.</i> , 2005) (Gardner <i>et al.</i> , 2000)                                                                                                                       |
| FVEG_01920      | <i>FvHEX1</i>    | Hex1 (cd04469)                                                   | Physiology and functioning of the Woronin body (Curach <i>et al.</i> , 2004), asexual production and pathogenicity in <i>F. graminearum</i> (Son <i>et al.</i> , 2013)                                                                                                                                 |
| FVEG_11334      | <i>FvPEX14</i>   | Pex14_N (pfam04695)                                              | Sustain the formation of fruiting bodies and the maturation and germination of sexual spores (Peraza-Reyes & Berteaux-Lecellier, 2013). Important for lipid metabolism (Wanders <i>et al.</i> , 2010) and are implicated in the homeostasis of reactive oxygen species (Fransen <i>et al.</i> , 2012). |

**References**

- Arevalo-Rodriguez, M. and Heitman, J.** (2005) Cyclophilin A is localized to the nucleus and controls meiosis in *Saccharomyces cerevisiae*. *Eukaryot. Cell*, **4**, 17-29.
- Cantacessi, C., Campbell, B. E., Visser, A., Geldhof, P., Nolan, M. J., Nisbet, A. J., et al.** (2009) A portrait of the "SCP/TAPS" proteins of eukaryotes - Developing a framework for fundamental research and biotechnological outcomes. *Biotechnol. Adv*, **27**, 376-388.
- Curach, N. C., Te'o, V. S. J., Gibbs, M. D., Bergquist, P. L. and Nevalainen, K. M. H.** (2004) Isolation, characterization and expression of the hex1 gene from *Trichoderma reesei*. *Gene*, **331**, 133-140.
- Fransen, M., Nordgren, M., Wang, B. and Apanasets, O.** (2012) Role of peroxisomes in ROS/RNS-metabolism: Implications for human disease. *BBA-Mol. Basis Dis*, **1822**, 1363-1373.

- Gardner, R. G., Swarbrick, G. M., Bays, N. W., Cronin, S. R., Wilhovsky, S., Seelig, L., et al.** (2000) Endoplasmic reticulum degradation requires lumen to cytosol signaling: Transmembrane control of Hrd1p by Hrd3p. *J. Cell Biol*, **151**, 69-82.
- Kamauchi, S., Nakatani, H., Nakano, C. and Urade, R.** (2005) Gene expression in response to endoplasmic reticulum stress in *Arabidopsis thaliana*. *FEBS J*, **272**, 3461-3476.
- Peraza-Reyes, L. and Berteaux-Lecellier, V.** (2013) Peroxisomes and sexual development in fungi. *Front. Physiol*, **4**.
- Son, M., Lee, K. M., Yu, J., Kang, M., Park, J. M., Kwon, S. J., et al.** (2013) The HEX1 Gene of *Fusarium graminearum* Is Required for Fungal Asexual Reproduction and Pathogenesis and for Efficient Viral RNA Accumulation of *Fusarium graminearum* Virus 1. *J. Virol*, **87**, 10356-10367.
- Viaud, M., Brunet-Simon, A., Brygoo, Y., Pradier, J. M. and Levis, C.** (2003) Cyclophilin A and calcineurin functions investigated by gene inactivation, cyclosporin A inhibition and cDNA arrays approaches in the phytopathogenic fungus *Botrytis cinerea*. *Mol. Microbiol*, **50**, 1451-1465.
- Wanders, R. J. A., Ferdinandusse, S., Brites, P. and Kemp, S.** (2010) Peroxisomes, lipid metabolism and lipotoxicity. *BBA-Mol. Cell. Biol L*, **1801**, 272-280.

**Table S3. *F. verticillioides* strains used in this study.**

| Strain                         | Source            |
|--------------------------------|-------------------|
| <i>F. verticillioides</i> 7600 | FGSC              |
| $\Delta$ fsr1                  | Shim et al., 2006 |
| $\Delta$ Fvstp1                | This study        |
| $\Delta$ Fvcyp1                | This study        |
| $\Delta$ Fvscp1                | This study        |
| $\Delta$ Fvsel1                | This study        |
| Fvstp1c                        | This study        |
| Fvstp1nc                       | This study        |
| Fvcyp1c                        | This study        |
| Fvscp1c                        | This study        |
| Fvsel1c                        | This study        |
| Fvcyp1-gfp                     | This study        |
| Fvscp1-gfp                     | This study        |
| Fvsel1-gfp                     | This study        |
| Fsr1-gfp                       | This study        |
| Fvcyp1-Fsr1-gfp                | This study        |
| Fvscp1-Fsr1-gfp                | This study        |
| Fvscp1-Fsr1-gfp                | This study        |

**Table S4. Primers used in this study. The underlined sequences were for fusion purpose. The recognition site of the restriction enzyme is shaded in select primer sequences.**

| Primer Name   | 5'-3' sequence                                      |
|---------------|-----------------------------------------------------|
| FsrExon1for   | CATCTCTCCCAAACCGACTC                                |
| FsrExon1revt  | CACTGGCATATCCTCCAAGGTAGATCTAAGCTTCTCTTGTATCTTTGC    |
| FsrExon2fort  | GCAAAGATACAAGAGAAGCTTAGATCTACCTTGGAGGATATGCCAGTG    |
| FsrExon2rev   | CTTCGTGGCCAGAAATGATAG                               |
| FNcos         | GCCGCCATGGGCCCTA ATGCT                              |
| FBrev         | CAGCCATGGGATCCGTCCACC                               |
| T7seq         | TAATACGACTCACTATAGGGC                               |
| jRv           | CTCCCGAGCCTGAAGCTGAGCCGTCGAGTTCCTATCGCGCTCATG       |
| iFw           | CATGAGCGCGATAGGAACTCGACGGCTCAGCTTCAGGCTCGGGAG       |
| 3'BDseq       | TTTTCGTTTTAAACCTAAGAGTC                             |
| 5'BDnfor      | CATCATGGAGGAGCAGAAG                                 |
| 3'BDnrev      | CATAAATCATAAGAAATTCGCCCGG                           |
| 5'LD Amplimer | CTATTGATGATGAAGATACCCACCAAACCC                      |
| 3'LD Amplimer | GTGAACTTGCGGGGTTTTTCAGTATCTACGAT                    |
| FCC1n LUC-F   | <u>AAGCTCGAGTAGTCGAC</u> ATGTCAGCCAATTATTGGCAC      |
| FCC1nLUC-R    | <u>CGTACGAGATCTGGTCGAC</u> CTTATCTAAGCCTCTTGCCCTT   |
| FCK1cLUC-F    | <u>CGTCCCGGGGCGGTACC</u> CCTCTCCGTCCTCACATCG        |
| FCK1cLUC-R    | <u>TTGGATCCCCGGGTACC</u> CTATTCTTCTGCCTCTTGGC       |
| STR1nLUC-F    | <u>AAGCTCGAGTAGTCGAC</u> ATGGGCCCTAATGCTGGCAA       |
| STR1nLUC-R    | <u>CGTACGAGATCTGGTCGACT</u> CGTGCAAACACCTTGACCAC    |
| STR2cLUC-F    | <u>CGTCCCGGGGCGGTACC</u> CCTCATTCTTCAACAGATACTTCTAC |
| STR2cLUC-R    | <u>TTGGATCCCCGGGTACC</u> TTACCAGACCTCACCCGG         |
| STR3cLUC-F    | <u>CGTCCCGGGGCGGTACC</u> AGACCCTCCCTCTTCAAGCC       |
| STR3cLUC-R    | <u>TTGGATCCCCGGGTACC</u> TTACAGCTCACCAGAGTCGACA     |
| STR4cLUC-F    | <u>CGTCCCGGGGCGGTACC</u> CCTTTTGTACCGTCTGTAGTG      |
| STR4cLUC-R    | <u>TTGGATCCCCGGGTACC</u> TTAGACAGTAACGCGCTTCTCG     |
| STR5cLUC-F    | <u>CGTCCCGGGGCGGTACC</u> GCCAGCTATCAGCAATATGC       |
| STR5cLUC-R    | <u>TTGGATCCCCGGGTACC</u> TTACATGAGGATCTGTCAATGGT    |
| 1F            | CGTTACCAATTCCCAAGGCTG                               |
| 2R            | <u>TAGATGCCGACCGGGAACG</u> TTTGGGGCATGGCATTTTG      |
| 3F            | <u>CCACTAGCTCCAGCCAAGG</u> CCTCCTCACTGTTACACAAAGG   |

|        |                                                                               |
|--------|-------------------------------------------------------------------------------|
| 4R     | CAGCTGCACTGGCTATCTAG                                                          |
| 5F     | AAGAGCGCGAGCGATTTTC                                                           |
| 6R     | GAAATCGCTCGCGCTCTT                                                            |
| 7F     | GGCAAAGCAAAGGACAGAA                                                           |
| 8F     | TCTACCACAGAGAGCTCTGG                                                          |
| 9R     | <u>TAGATGCCGACCGGGAACCTC</u> ATTTTGAGGAAGCTGGAGG                              |
| 10F    | <u>CCACTAGCTCCAGCCAAGGACAAAGGGATGGGATTTGGGA</u>                               |
| 11R    | AGAAGCGACTGAACATGCACG                                                         |
| 12F    | TACTCAACTGAGAACAGCCA                                                          |
| 13R    | CACAGAGATGGACTTACCCT                                                          |
| 14F    | CCGCTCTCAACTCCGATAGTAG                                                        |
| 15R    | <u>TAGATGCCGACCGGGAACAAAGGCATGGCTCTGCTTC</u>                                  |
| 16F    | <u>CCACTAGCTCCAGCCAAGGGCACGCTTCTACATCGATC</u>                                 |
| 17R    | TGCCTCGCAAGTATCTCTACC                                                         |
| 18F    | GGCTTCTTTTGTACTCCCTG                                                          |
| 19R    | AGCACTCCGTCAATAAACAC                                                          |
| 20F    | AATTCGAGAAGCAGGCGAG                                                           |
| 21R    | <u>TAGATGCCGACCGGGAACGCCAAGCTGTGCATATTGCT</u>                                 |
| 22F    | <u>CCACTAGCTCCAGCCAAGGGACTAAACCAAGTGGGACATG</u>                               |
| 23R    | TTGCACTTCCACATGCTGC                                                           |
| 24F    | GGCTTCTTTTGTACTCCCTG                                                          |
| 25R    | AGCACTCCGTCAATAAACAC                                                          |
| 26F    | GGAGAAGACCCAGAAGAAGG                                                          |
| 27R    | CGGGAGCAGAACTCACTACA                                                          |
| HYG-F  | CTTGGCTGGAGCTAGTGGAGGTCAA                                                     |
| HY-R   | GTATTGACCGATTCTTGCGGTCCGAA                                                    |
| YG-F   | GATGTAGGAGGGCGTGGATATGTCCT                                                    |
| HYG-R  | GTTCCCGGTCTGGCATCTACTCTAT                                                     |
| GFP-R2 | <u>GGCACCGGCTCCAGCGCCTGCACCAGCTCCCTTGTACAGCTCGTCCATGC</u>                     |
| RP27-F | TCT TCG CTA TTA CGC CAG C                                                     |
| RP27-R | TTT GAA GAT TGG GTT CCT ACG                                                   |
| CYP-F  | <u>GGA GCT GGT GCA GGC GCT GGA GCC GGT GCC</u> ATG AGA CCC TCC CTC<br>TTC AAG |
| CYP-R  | TTA CAG CTC ACC AGA GTC GAC A                                                 |
| SCP-F  | <u>AGG AAC CCA ATC TTC AAA</u> ATG CCT TTT GTC ACC GTC TG                     |

|        |                                                                 |
|--------|-----------------------------------------------------------------|
| SCP-R  | GGCACCGGCTCCAGCGCCTGCACCAGCTCCGAC AGT AAC GCG CTT CTC G         |
| SEL-F  | AGG AAC CCA ATC TTC AAA ATG GCT CCC CCA CAG TTA G               |
| SEL-R  | GGCACCGGCTCCAGCGCCTGCACCAGCTCCCAT GAG GAT CTG TCA ATG<br>GTG TT |
| FSR1-F | AGG AAC CCA ATC TTC AAA ATG GGC CCT AAT GCT GGC AA              |
| FSR1-R | GCTTGGCGGACCATGGTATTGT                                          |
| GFP-SF | ACA TGA AGC AGC ACG ACT TC                                      |
| GFP-SR | GAA GTC GTG CTG CTT CAT GT                                      |
