# Supplementary material
Source: PubMed Central journal article supplement (PMC6638083)
Supplement: MPP-19-812-s003.pdf [file MPP-19-812-s003.pdf]

Fig. S2. *N. crassa* complementation transformation PCR

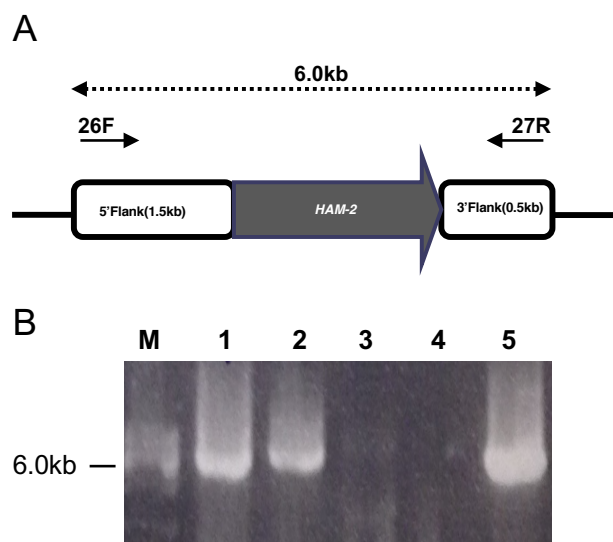

Fig. S2. (A) The fragment of *FvSTP1* homolog in *Neurospora crassa* was generated by PCR with primers 26F and 27R. The fragment was co-transformed along with geneticin-resistant cassette into  $\Delta FvSTP1$  mutant protoplast. Geneticin-resistant colonies were selected for PCR screening to verify complementation. (B) PCR screening was performed by using 26F and 27R primers: 1: *FvSTP1-NC1*; 2, *FvSTP1-NC2*; 3, WT control; 4, Blank control; 5, *N. crassa* gDNA positive control.
